# Supplementary material
Source: PubMed Central journal article supplement (PMC3592983)
Supplement: NIHMS396032-supplement-01.pdf [file NIHMS396032-supplement-01.pdf]

# Bridging Research and Practice

## Models for Dissemination and Implementation Research

Rachel G. Tabak, PhD, Elaine C. Khoong, BS, David Chambers, DPhil, Ross C. Brownson, PhD

### Appendix A

#### Categorization of dissemination and implementation models for use in research studies

| Model                                                                                       | D and/or I | Construct flexibility | Socio-ecological level |           |              |            | Policy | Field of origin                                    | Studies that use the model (Reference #) | Number of times model has been cited <sup>a</sup> | Citations (Reference #) |
|---------------------------------------------------------------------------------------------|------------|-----------------------|------------------------|-----------|--------------|------------|--------|----------------------------------------------------|------------------------------------------|---------------------------------------------------|-------------------------|
|                                                                                             |            |                       | System                 | Community | Organization | Individual |        |                                                    |                                          |                                                   |                         |
| Diffusion of Innovation                                                                     | D-only     | 1                     |                        | x         | x            | x          |        | Agriculture                                        | 1–8                                      | 39,364 <sup>b</sup>                               | 9                       |
| RAND Model of Persuasive Communication and Diffusion of Medical Innovation                  | D-only     | 1                     |                        | x         | x            | x          |        | Medical information: technology assessment         | 10                                       | 56                                                | 11                      |
| Effective Dissemination Strategies                                                          | D-only     | 2                     |                        | x         | x            | x          |        | Nursing research                                   | —                                        | 24                                                | 12                      |
| Model for Locally Based Research Transfer Development                                       | D-only     | 2                     |                        | x         | x            |            |        | Local health and social service delivery agency    | —                                        | 50                                                | 13                      |
| Streams of Policy Process                                                                   | D-only     | 2                     | x                      | x         | x            |            | x      | Political science                                  | 14–16                                    | 8,091 <sup>c</sup>                                | 17, 18                  |
| A Conceptual Model of Knowledge Utilization                                                 | D-only     | 3                     | x                      | x         |              |            | x      | Knowledge utilization in public policy             | —                                        | 52                                                | 19                      |
| Conceptual Framework for Research Knowledge Transfer and Utilization                        | D-only     | 3                     |                        |           | x            |            |        | Workplace health and safety                        | 20                                       | 32                                                | 21                      |
| Conceptualizing Dissemination Research and Activity: Canadian Heart Health Initiative       | D-only     | 3                     |                        | x         | x            |            |        | Public health systems                              | —                                        | 31                                                | 22, 23                  |
| Policy Framework for Increasing Diffusion of Evidence-Based Physical Activity Interventions | D-only     | 3                     | x                      | x         | x            |            | x      | Public health: health behavior - physical activity | —                                        | 54                                                | 24                      |
| Blueprint for Dissemination                                                                 | D-only     | 4                     |                        | x         | x            |            |        | Quality of health care                             | —                                        | 6                                                 | 25                      |
| Framework for Knowledge Translation                                                         | D-only     | 5                     |                        | x         | x            | x          |        | Knowledge translation                              | —                                        | 113                                               | 26                      |
| A Framework For Analyzing Adoption of Complex Health Innovations                            | D>I        | 2                     | x                      | x         | x            | x          |        | Health systems                                     | 27–32                                    | 34 <sup>d</sup>                                   | 33, 34                  |
| A Framework for Spread                                                                      | D>I        | 2                     |                        | x         | x            |            |        | Veteran affairs healthcare access                  | 35                                       | 32                                                | 36, 37                  |
| Collaborative Model for Knowledge Translation Between Research and Practice Settings        | D>I        | 2                     |                        |           | x            | x          |        | Clinical healthcare settings                       | —                                        | 30                                                | 38                      |
| Coordinated Implementation Model                                                            | D>I        | 2                     |                        |           | x            | x          |        | Health care: obstetric                             | —                                        | 111                                               | 39                      |

| Model                                                                                       | Socio-ecological level |                          |        |           |              |            |        | Field of origin<br>care                                                 | Studies that<br>use the<br>model<br>(Reference #) | Number of<br>times<br>model has<br>been cited <sup>a</sup> | Citations<br>(Reference #) |
|---------------------------------------------------------------------------------------------|------------------------|--------------------------|--------|-----------|--------------|------------|--------|-------------------------------------------------------------------------|---------------------------------------------------|------------------------------------------------------------|----------------------------|
|                                                                                             | D and/or I             | Construct<br>flexibility | System | Community | Organization | Individual | Policy |                                                                         |                                                   |                                                            |                            |
| Model for Improving the Dissemination of Nursing Research                                   | D>I                    | 2                        |        | x         | x            | x          |        | Nursing research                                                        | —                                                 | 49                                                         | 40                         |
| Framework for the Dissemination & Utilization of Research for Health-Care Policy & Practice | D>I                    | 3                        |        | x         | x            | x          |        | Health policy and clinical decision-making                              | 41–44                                             | 125                                                        | 45, 46                     |
| Framework of Dissemination in Health Services Intervention Research                         | D>I                    | 3                        | x      | x         | x            |            |        | Health services                                                         | —                                                 | 44                                                         | 47                         |
| Linking Systems Framework                                                                   | D>I                    | 3                        |        | x         | x            | x          |        | Public health: health promotion                                         | —                                                 | 29                                                         | 48                         |
| Marketing and Distribution System for Public Health                                         | D>I                    | 3                        | x      | x         | x            | x          |        | Public health                                                           | —                                                 | —                                                          | 49                         |
| OutPatient Treatment in Ontario Services (OPTIONS) Model                                    | D>I                    | 3                        |        | x         | x            | x          |        | Mental health: substance abuse                                          | 50, 51                                            | 57                                                         | 52                         |
| A Conceptual Model for the Diffusion of Innovations in Service Organizations                | D>I                    | 4                        |        | x         | x            |            |        | Health services                                                         | 53, 54                                            | 1190                                                       | 55                         |
| Health Promotion Research Center Framework                                                  | D>I                    | 4                        | x      | x         | x            |            | x      | Public health: health promotion                                         | —                                                 | —                                                          | 56                         |
| Knowledge Exchange Framework                                                                | D>I                    | 4                        | x      | x         | x            | x          |        | Knowledge transfer                                                      | 57                                                | 27                                                         | 58–60                      |
| Research Knowledge Infrastructure                                                           | D>I                    | 4                        |        | x         | x            | x          | x      | Knowledge transfer in health and economic/social research organizations | 61                                                | 111, 437 <sup>e</sup>                                      | 62–65                      |
| A Convergent Diffusion and Social Marketing Approach for Dissemination                      | D>I                    | 5                        |        | x         | x            |            |        | Public health: physical activity                                        | 66                                                | 56                                                         | 67, 68                     |
| Framework for Dissemination of Evidence-Based Policy                                        | D>I                    | 5                        |        | x         | x            | x          |        | Public health                                                           | —                                                 | —                                                          | 69                         |
| Health Promotion Technology Transfer Process                                                | D=I                    | 1                        |        | x         | x            |            |        | Health promotion technology transfer                                    | —                                                 | 54                                                         | 70                         |
| Real-World Dissemination                                                                    | D=I                    | 1                        |        | x         | x            |            |        | Health care                                                             | —                                                 | 690                                                        | 71, 72                     |
| A Framework for the Transfer of Patient Safety Research into Practice                       | D=I                    | 2                        | x      |           | x            |            |        | Patient safety                                                          | 73                                                | 16                                                         | 74                         |
| Interacting Elements of Integrating Science, Policy, and Practice                           | D=I                    | 2                        | x      | x         |              |            |        | Dissemination and implementation in health research                     | —                                                 | —                                                          | 75                         |
| Interactive Systems Framework                                                               | D=I                    | 2                        | x      | x         | x            | x          |        | Violence prevention                                                     | 76–80                                             | 116                                                        | 81                         |
| Push–Pull Capacity Model                                                                    | D=I                    | 2                        | x      | x         | x            |            | x      | Physical activity                                                       | 82, 83                                            | 39                                                         | 84                         |
| Research Development Dissemination and Utilization Framework                                | D=I                    | 2                        | x      | x         | x            | x          |        | Research utilization                                                    | —                                                 | 420                                                        | 85                         |
| Utilization-Focused Surveillance Framework                                                  | D=I                    | 2                        | x      | x         | x            |            |        | Public health                                                           | —                                                 | 67                                                         | 86                         |
| “4E” Framework for Knowledge Dissemination and Utilization                                  | D=I                    | 3                        |        | x         | x            | x          |        | Aging and mental health                                                 | 87–90                                             | 35                                                         | 91, 92                     |
| Critical Realism & the Arts Research Utilization Model (CRARUM)                             | D=I                    | 3                        |        |           | x            | x          |        | Clinical practice guidelines                                            | —                                                 | 27                                                         | 93                         |
| Davis' Pathman-PRECEED Model                                                                | D=I                    | 3                        |        | x         | x            | x          |        | Public health and medicine                                              | —                                                 | 339 <sup>f</sup>                                           | 94–96                      |

| Model                                                                                             | D and/or I | Construct flexibility | Socio-ecological level |           |              |            | Policy | Field of origin                                                            | Studies that use the model (Reference #) | Number of times model has been cited <sup>a</sup> | Citations (Reference #) |
|---------------------------------------------------------------------------------------------------|------------|-----------------------|------------------------|-----------|--------------|------------|--------|----------------------------------------------------------------------------|------------------------------------------|---------------------------------------------------|-------------------------|
|                                                                                                   |            |                       | System                 | Community | Organization | Individual |        |                                                                            |                                          |                                                   |                         |
| Dissemination of Evidence-based Interventions to Prevent Obesity                                  | D=I        | 3                     |                        | x         | x            |            |        | Obesity prevention                                                         | —                                        | —                                                 | 97                      |
| Knowledge Translation Model of Tehran University of Medical Sciences                              | D=I        | 3                     |                        |           | x            | x          |        | Health science                                                             | 98, 99                                   | 13                                                | 100, 101                |
| Multi-level Conceptual Framework of Organizational Innovation Adoption                            | D=I        | 3                     |                        |           | x            | x          |        | Marketing and management in innovation adoption and technology acceptance  | 102, 103                                 | 388                                               | 104                     |
| Ottawa Model of Research Use                                                                      | D=I        | 4                     |                        | x         | x            | x          |        | Health care                                                                | 105–110                                  | 147                                               | 111, 112                |
| The RE-AIM Framework                                                                              | D=I        | 4                     |                        | x         | x            | x          |        | Public health                                                              | 113–116                                  | 728                                               | 117                     |
| The Precede–Proceed Model                                                                         | D=I        | 5                     |                        | x         | x            | x          |        | Health                                                                     | 118–121                                  | 391                                               | 96                      |
| Facilitating Adoption of Best Practices (FAB) Model                                               | I>D        | 2                     |                        | x         | x            |            |        | Medicine                                                                   | —                                        | —                                                 | 122                     |
| A Six-Step Framework For International Physical Activity Dissemination                            | I>D        | 3                     | x                      | x         | x            | x          | x      | Physical activity                                                          | —                                        | 27                                                | 123                     |
| Pathways to Evidence Informed Policy                                                              | I>D        | 3                     | x                      | x         | x            | x          | x      | Public health                                                              | —                                        | 166                                               | 124                     |
| CDC DHAP's Research-to-Practice Framework                                                         | I>D        | 4                     |                        | x         | x            |            |        | HIV/AIDS prevention                                                        | —                                        | 77, 43 <sup>e</sup>                               | 125–130                 |
| Practical, Robust Implementation and Sustainability Model (PRISM)                                 | I>D        | 4                     |                        |           | x            | x          |        | Public health                                                              | 131                                      | 22                                                | 132                     |
| Active Implementation Framework                                                                   | I-only     | 3                     |                        | x         | x            | x          |        | Any domain                                                                 | 133, 134                                 | 904                                               | 135, 136                |
| An Organizational Theory of Innovation Implementation                                             | I-only     | 3                     |                        |           | x            |            |        | Worksite health promotion                                                  | 137                                      | 28                                                | 138                     |
| Conceptual Model of Implementation Research                                                       | I-only     | 3                     | x                      | x         | x            | x          |        | Mental health services                                                     | 139                                      | 71                                                | 140                     |
| Implementation Effectiveness Model                                                                | I-only     | 3                     |                        |           | x            | x          |        | Management                                                                 | 141–146                                  | 830                                               | 147, 148                |
| Normalization Process Theory                                                                      | I-only     | 3                     | x                      | x         | x            | x          |        | Health care and medicine                                                   | 149–154                                  | 53                                                | 155–157                 |
| Promoting Action on Research Implementation in Health Services (PARIHS)                           | I-only     | 3                     |                        | x         | x            | x          |        | Health services                                                            | 158–163                                  | 590                                               | 164–166                 |
| Pronovost's 4E's Process Theory                                                                   | I-only     | 3                     |                        | x         | x            | x          |        | Health care and medicine                                                   | 167, 168                                 | 91                                                | 169                     |
| Sticky Knowledge                                                                                  | I-only     | 3                     |                        | x         | x            | x          |        | Strategic management and medicine                                          | 170                                      | 19, 4377 <sup>h</sup>                             | 171, 172                |
| Consolidated Framework for Implementation Research                                                | I-only     | 4                     |                        | x         | x            |            |        | Health services                                                            | 173–176                                  | 91                                                | 177, 178                |
| Replicating Effective Programs Plus Framework                                                     | I-only     | 4                     |                        | x         | x            |            |        | Clinical and health services intervention in community-based organizations | 179, 180                                 | 32                                                | 181                     |
| Availability, Responsiveness & Continuity (ARC): An Organizational & Community Intervention Model | I-only     | 5                     |                        | x         | x            |            |        | Mental health treatment in community settings                              | 182                                      | 89                                                | 183, 184                |
| Conceptual Model of Evidence-Based Practice Implementation in Public Service Sectors              | I-only     | 5                     |                        | x         | x            |            |        | Public sector services                                                     | —                                        | 18                                                | 185                     |

Note: Construct flexibility scale: 1 (broad)–5 (operational).

<sup>a</sup> In most cases, the value shows the number of times a model was cited based on the earliest reference to the model, which serves as an imperfect proxy to gauge use of the model in research studies. In some cases, exceptions were made to this rule based on the judgment of the authors. These citation numbers were acquired on February 7, 2012.

<sup>b</sup> This citation number is provided for the 1995 edition (which first appears in Google Scholar) and not the edition that is cited.<sup>9</sup>

<sup>c</sup> This citation number is provided for the 1984 edition (the first edition)<sup>17</sup> and not the most recent edition.<sup>18</sup>

<sup>d</sup> This citation number is provided for the 2010 reference,<sup>33</sup> which is when the model was first published. The earlier citation<sup>34</sup> is included to provide some background information on the development of the model.

<sup>e</sup> These are the citation numbers for the 2003 article<sup>65</sup> (437 citations) and the 2006<sup>64</sup> (111 citations) article. These were selected because the authors felt these articles best explained the model.

<sup>f</sup> This citation number is provided for the 2003 reference.<sup>94</sup> The other included references were used as the basis of the model that is described in the 2003 reference.

<sup>g</sup> These are the citation numbers for the 2006 Collins<sup>125</sup> (77 citations) and 2000 Neumann<sup>127</sup> (43 citations) articles. These were selected because the authors felt these articles best explained the model.

<sup>h</sup> Citation numbers for both the Elwyn<sup>171</sup> (19 citations) and Szulanski<sup>172</sup> (4377 citations) references are provided. Both were included because the authors felt the references were sufficiently different that the citation numbers for both would be useful.

D, dissemination; DHAP, Division of HIV/AIDS Prevention; 4E, exposure, experience, expertise, embedding; I, implementation; RAND, research and development; RE-AIM, reach, effectiveness, adoption, implementation, and maintenance

## Appendix B

### Case Study 2: Streams of policy process (obesity prevention legislation) <sup>15,18</sup>

**Model Background:** The Streams of Policy Process model argues that policy change is influenced by three major process streams: (1) Recognition that a policy problem exists that needs to be addressed (the problem stream); (2) Development, refinement and vetting of policy proposals purporting to correct the policy problem (the policy stream); and (3) The flow of political events through which policy changes are effected (the political stream). These streams operate independently and an issue is most likely to arise on the policy agenda when there is an intersection, or 'coupling,' between the streams. When coupling occurs it creates a window of opportunity for policy action. Although coupling is often unpredictable, policy entrepreneurs often look for or create windows of opportunity for action.

**Study:** Arkansas's Act 1220 of 2003: School-based Childhood Obesity Legislation

**Study Background:** Arkansas policy-makers recognized that halting the obesity epidemic necessitated progressive steps to outpace increasing disease rates. With the passage of Act 1220 in 2003, Arkansas enacted comprehensive legislation to combat childhood obesity. Act 1220 mandated immediate action while establishing the mechanisms for short- and long-term change at both state and local levels. This study explored factors that allowed the issue of childhood obesity to rise to the forefront of an overburdened legislative agenda and garner political attention resulting in legislative adoption.

**Use of Policy Streams:** This study used the Streams of Policy Process to guide the analysis. Factors that enabled the passage of Act 1220 were mapped onto the constructs of the analysis framework. One informant noted that public health leaders had for many years presented annual updates to legislators about the burden of obesity in Arkansas (problem stream). Another one noted that "the Act represented the culmination of a longer developmental process around the policy options available to the legislature" (policy stream). Recently, the Arkansas Legislature had commissioned the Arkansas Department of Health to establish an Obesity Task Force and Arkansas legislators were presented with a health resolution calling on them to take personal action and serve as role models in the state's efforts to combat childhood obesity. (political stream). With the support of two prominent politicians who had recently suffered from obesity related health problems, one of which served as a policy entrepreneur, a policy window for childhood obesity was opened.

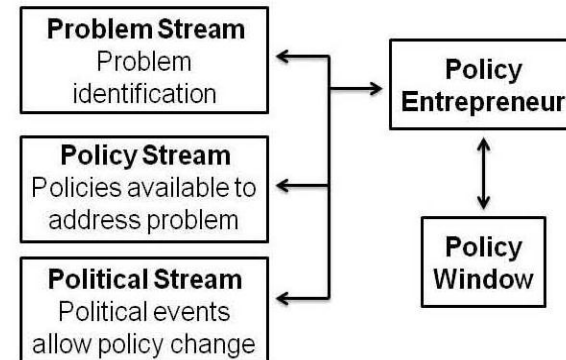

## Appendix C

### Case Study 3: Consolidated framework for implementation research (substance use disorder treatment)<sup>173,177</sup>

**Framework Background:** The Consolidated Framework for Implementation Research (CFIR) was created to combine multiple implementation theories into one framework. The CFIR is composed of five major domains: intervention characteristics, outer setting, inner setting, characteristics of the individuals involved, and the process of implementation. Each domain contains several constructs. For example, the intervention domain has the following constructs: intervention source, evidence strength and quality, relative advantage, adaptability, trialability, complexity, design quality and packaging, cost.

**Study:** Continuing Care in Substance Use Disorder Treatment

**Study Background:** Continuing care following substance use disorder treatment is associated with improved outcomes. Evidence-based interventions (EBI) for continuing care have been developed, but there are large gaps between what is delivered in actual clinical care and these EBIs. The CFIR was used to review the literature on continuing care treatment and monitoring to assess the barriers to use of EBIs and to provide recommendations on how to overcome identified barriers.

**Use of CFIR:** This study used the CFIR to frame the recommendations for researchers and practitioners on how to increase use of continuing care EBI. Using the intervention domain as an example, the authors determined the strengths of continuing care interventions were the quality of the evidence base and the adaptability of the intervention. However, the intervention was hindered by its complexity. Furthermore, implementation was made difficult by the lack of information on the relative advantage of various EBIs to each other, the cost-effectiveness of each EBI, and the determination of core vs. adaptable components of each EBI. The authors therefore suggested researchers should develop studies to shed more light on these aspects of the intervention.

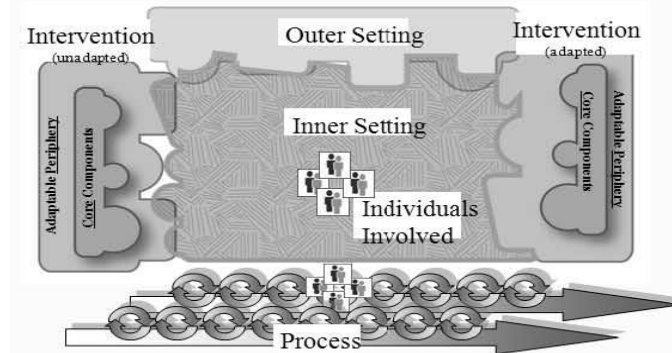

## Appendix D

### Case Study 4: Ottawa model of research use (technology use in government agencies)<sup>106,108,111,112</sup>

**Framework Background:** The Ottawa Model of Research Use (OMRU) was developed to be used by both policymakers and researchers. The OMRU contains six constructs that were determined to be central to the process of research use: practice environment, potential adopters, evidence-based innovation, transfer strategies, adoption, and outcomes. These constructs are connected to each other through the processes of assessment, monitoring, and evaluation.

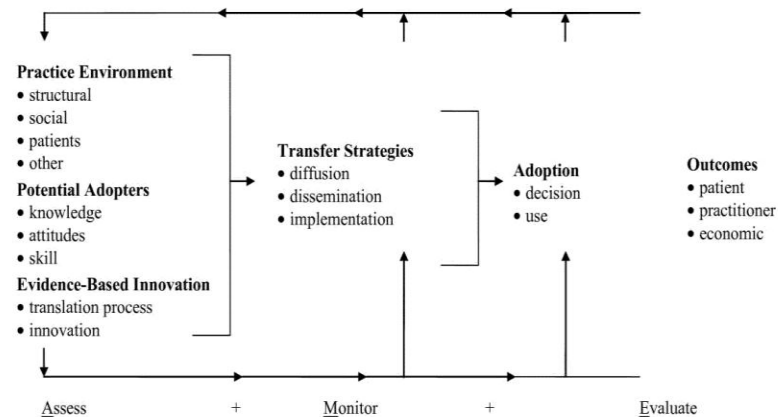

**Study:** Geographic Information System Technology Use in Local Ontario Early Years Centres

**Study Background:** Ontario Early Year Centres (OEYCs) are agencies that provide services to young children and their parents/caregivers. The OEYCs collect rich, context-specific data, including data collected by geographic information system (GIS) mapping software, to inform decision-making and better serve clients. However, use of data, and GIS data specifically, by agency leaders has been inconsistent. Researchers investigated the barriers to implementation of mapping software as tools to support decision-making.

**Use of OMRU:** The researchers leading this study planned a two-phase qualitative study. The first phase focused on assessment by exploring how the culture of OEYCs influences perceptions, beliefs, and attitudes towards mapping programs. Using the OMRU, the investigators grouped identified barriers into the three constructs of assessment: innovation (prohibitive cost, limitations of previous mapping software, and expectations of the program); potential adopters (attitudes, skills related to interpreting maps, confusion on roles of managers vs data analysts); and environment (accurate data collection, confidentiality concerns, and usefulness of required reported data). The second phase of the study evaluated the use and impact of mapping software during and after implementation of interventions tailored to address the identified innovation, adopters, and environment-related barriers. This second phase encompassed the remainder of the OMRU model by implementing an intervention to increase knowledge transfer and assessing outcomes, in terms of increased adoption by OEYC managers and better provision of services to OEYC clients.

## Appendix E

### Case Study 5: Interactive system framework (teen pregnancy prevention)<sup>78,81</sup>

**Framework Background:** The Interactive System Framework (ISF) was originally developed to be used by different types of stakeholders (e.g., funders, practitioners, researchers) to better understand the needs of all stakeholders and systems. The ISF identifies three systems: the Prevention Delivery System which implements innovations; the Prevention Support System which provides training, technical assistance (TA) or other support to users; and the Prevention Synthesis and Translation System which distills information and translates it into user-friendly formats. Each of these activities is necessary for the movement of innovations into widespread prevention practice at the community level.

**Study:** Promoting Science-based Approaches to Teen Pregnancy Prevention project (PSBA)

**Study Background:** The PSBA program was a multi-site, capacity-building effort that aimed to assist local prevention partners in the use of science-based approaches (SBA) to prevent teen pregnancy. ISF was adopted to allow for specific and strategic planning about what capacities were needed at the local level and to develop a framework for systematically building these capacities.

**Measures:** ISF was used to inform the evaluation and its measures for this project. Evaluation questions were developed to document and evaluate the process and outcomes of the PSBA project. There was a particular focus placed on how well the ISF-inspired, capacity-building model improved prevention practice among selected local partners.

**Use of ISF:** PSBA used all three systems of the ISF to facilitate practice improvements. The PSBA Prevention Delivery System included all local prevention partners who agreed to receive intensive TA from the state and regional grantees. The PSBA Prevention Support System included efforts made by CDC's national, regional, and state partners to strengthen their own general organizational capacity; build SBA-specific capacity to provide training and TA; and assist local partners. The PSBA Prevention Synthesis and Translation System consisted of creating an accessible and comprehensive manual called Promoting Science-based Approaches to Teen Pregnancy Prevention using Getting to Outcomes (PSBA-GTO).

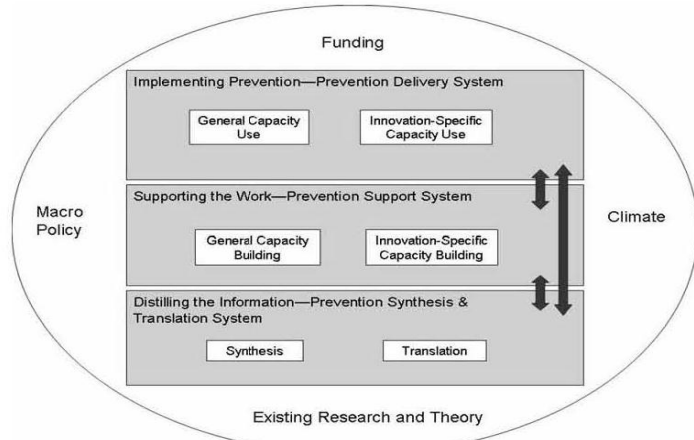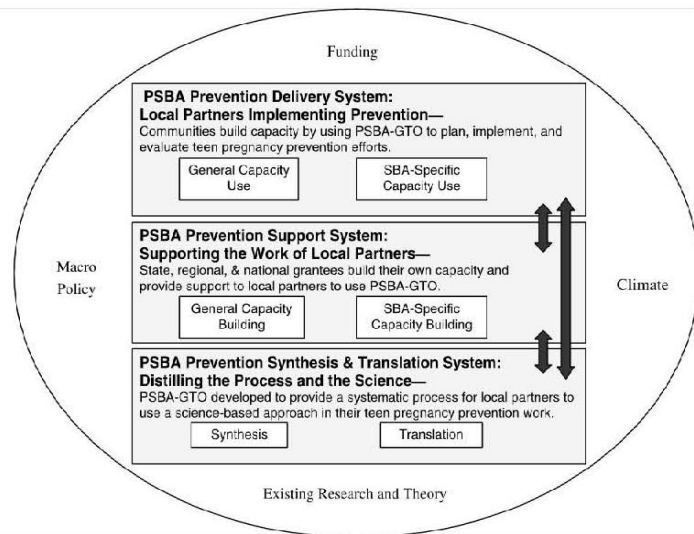



## References for Appendixes A–E

1. Dingfelder HE, Mandell DS. Bridging the research-to-practice gap in autism intervention: an application of diffusion of innovation theory. *J Autism Dev Disord* 2011;41(5):597–609.
2. Glanz K, Steffen A, Elliott T, O’Riordan D. Diffusion of an effective skin cancer prevention program: design, theoretical foundations, and first-year implementation. *Health Psychol* 2005;24(5):477–87.
3. Ball K. Compliance with surgical smoke evacuation guidelines: implications for practice. *AORN J* 2010;92(2):142–9.
4. Ball K. Surgical smoke evacuation guidelines: compliance among perioperative nurses. *AORN J* 2010;92(2):e1–e23.
5. Shively M, Riegel B, Waterhouse D, Burns D, Templin K, Thomason T. Testing a community level research utilization intervention. *Appl Nurs Res* 1997;10(3):121–7.
6. Wiecha JL, El Ayadi AM, Fuemmeler BF, et al. Diffusion of an integrated health education program in an urban school system: planet health. *J Pediatr Psychol* 2004;29(6):467–74.
7. Al-Ghaith WA, Sanzogni L, Sandhu K. Factors influencing the adoption and usage of online services in Saudi Arabia. *Electronic J Info Syst Developing Countries* 2010;40(1):1–32.
8. Nanney MS, Haire-Joshu D, Brownson RC, Kostelc J, Stephen M, Elliott M. Awareness and adoption of a nationally disseminated dietary curriculum. *Am Journal Health Behav* 2007;31(1):64–73.
9. Rogers EM. Diffusion of innovations. 5th ed. New York: Free Press, 2003.
10. Williams RB. Successful computerized physician order entry system implementation. *Healthcare Leadership & Management Report* 2002;10(10).
11. Winkler JD, Lohr KN, Brook RH. Persuasive communication and medical technology assessment. *Arch Intern Med* 1985;145(2):314–7.
12. Scullion PA. Effective dissemination strategies. *Nurse Res* 2002;10(1):65–77.
13. Anderson M, Cosby J, Swan B, Moore H, Broekhoven M. The use of research in local health service agencies. *Soc Sci Med* 1999;49(8):1007–19.
14. Bugeja L, McClure RJ, Ozanne-Smith J, Ibrahim JE. The public policy approach to injury prevention. *Injury Prevention* 2011;17(1):63–5.
15. Craig RL, Felix HC, Walker JF, Phillips MM. Public health professionals as policy entrepreneurs: Arkansas’s childhood obesity policy experience. *Am J Public Health* 2010;100(11):2047–52.
16. D’Abbs P. Alignment of the policy planets: behind the implementation of the Northern Territory (Australia) Living With Alcohol programme. *Drug Alcohol Rev* 2004;23(1):55–66.
17. Kingdon JW. Agendas, alternatives, and public policies. Boston: Little, Brown, 1984.
18. Kingdon JW. Agendas, alternatives, and public policies. Updated 2nd ed. Boston: Longman, 2010.
19. Lester JP. The utilization of policy analysis by state agency officials. *Sci Commun* 1993;14(3):267.
20. Kramer DM, Cole DC, Leithwood K. Doing knowledge transfer: engaging management and labor with research on employee health and safety. *Bull Sci, Technol Soc* 2004;24(4):316–30.
21. Kramer DM, Cole DC. Sustained, intensive engagement to promote health and safety knowledge transfer to and utilization by workplaces. *Sci Commun* 2003;25(1):56.
22. Riley BL, Stachenko S, Wilson E, et al. Can the Canadian Heart Health Initiative inform the population Health Intervention Research Initiative for Canada? *Can J Public Health* 2009;100(1S):S120–S126.
23. Elliott SJ, O’Loughlin J, Robinson K, et al. Conceptualizing dissemination research and activity: the case of the Canadian Heart Health Initiative. *Health Educ Behav* 2003;30(3):267–82; discussion 283–6.
24. Owen N, Glanz K, Sallis JF, Kelder SH. Evidence-based approaches to dissemination and diffusion of physical activity interventions. *Am J Prev Med* 2006;31(4S):S35–S44.
25. Yuan CT, Nembhard IM, Stern AF, Brush JE, Jr., Krumholz HM, Bradley EH. Blueprint for the dissemination of evidence-based practices in health care. *Issue Brief (Commonw Fund)* 2010;86:1–16.
26. Jacobson N, Butterill D, Goering P. Development of a framework for knowledge translation: understanding user context. *J Health Serv Res Policy* 2003;8(2):94–9.

27. Atun R, Pothapregada SK, Kwansah J, Degbotse D, Lazarus JV. Critical interactions between the Global Fund-supported HIV programs and the health system in Ghana. *J Acquir Imm Def Syndr* 2011;57(S2):S72-S76.
28. Conseil A, Mounier-Jack S, Coker R. Integration of health systems and priority health interventions: a case study of the integration of HIV and TB control programmes into the general health system in Vietnam. *Health Policy Plan* 2010;25(S1):i32.
29. Desai M, Rudge JW, Adisasmito W, Mounier-Jack S, Coker R. Critical interactions between Global Fund-supported programmes and health systems: a case study in Indonesia. *Health Policy Plan* 2010;25(S1):i43-7.
30. Hanvoravongchai P, Warakamin B, Coker R. Critical interactions between Global Fund-supported programmes and health systems: a case study in Thailand. *Health Policy Plan* 2010;25(S1):i53-7.
31. Mounier-Jack S, Rudge JW, Phetsouvanh R, Chanthapadith C, Coker R. Critical interactions between Global Fund-supported programmes and health systems: a case study in Lao People's Democratic Republic. *Health Policy Plan* 2010;25(S1):i37-42.
32. Rudge JW, Phuanakoonon S, Nema KH, Mounier-Jack S, Coker R. Critical interactions between Global Fund-supported programmes and health systems: a case study in Papua New Guinea. *Health Policy Plan* 2010;25(S1):i48-52.
33. Atun R, de Jongh T, Secci F, Ohiri K, Adeyi O. Integration of targeted health interventions into health systems: a conceptual framework for analysis. *Health Policy Plan* 2010;25(2):104-11.
34. Atun RA, Kyratsis I, Jelic G, Rados-Malicbegovic D, Gurol-Urganci I. Diffusion of complex health innovations—implementation of primary health care reforms in Bosnia and Herzegovina. *Health Policy Plan* 2007;22(1):28-39.
35. Morgenthaler TI, Lovely JK, Cima RR, et al. Using a framework for spread of best practices to implement successful venous thromboembolism prophylaxis throughout a large hospital system. *Am J Med Qual* 2012;27(1):30-8.
36. Langley GJ. *The improvement guide: a practical approach to enhancing organizational performance*. 2nd ed. San Francisco: Jossey-Bass, 2009.
37. Nolan K, Schall MW, Erb F, Nolan T. Using a framework for spread: the case of patient access in the Veterans Health Administration. *Jt Comm J Qual Patient Safety* 2005;31(6):339-47.
38. Baumbusch JL, Kirkham SR, Khan KB, et al. Pursuing common agendas: a collaborative model for knowledge translation between research and practice in clinical settings. *Res Nurs Health* 2008;31(2):130-40.
39. Lomas J. Retailing research: increasing the role of evidence in clinical services for childbirth. *Milbank Q* 1993;439-75.
40. Funk SG, Tornquist EM, Champagne MT. A model for improving the dissemination of nursing research. *West J Nurs Res* 1989;11(3):361-72.
41. Dobbins M, DeCorby K, Twiddy T. A knowledge transfer strategy for public health decision makers. *Worldviews Evid Based Nurs* 2004;1(2):120-8.
42. Dobbins M, Hanna SE, Ciliska D, et al. A randomized controlled trial evaluating the impact of knowledge translation and exchange strategies. *Implement Sci* 2009;4:61.
43. Jack SM, Dobbins M, Sword W, et al. Evidence-informed decision-making by professionals working in addiction agencies serving women: a descriptive qualitative study. *Subst Abuse Treat Prev Policy* 2011;6:29.
44. Jack SM, Dudding PRSW, Tonmyr L, Dobbins M, Brooks S. *The uptake and utilization of research evidence by Ontario child welfare decision-makers: final report*. Ottawa, ON: Centre of Excellence for Child and Youth Mental Health at CHEO, 2009.
45. Dobbins M, DeCorby K, Robeson P, Tirilis D. Public health model. In: Rycroft-Malone J, Bucknall T, eds. *Models and frameworks for implementing evidence-based practice: linking evidence to action*. Chichester UK: Wiley-Blackwell, 2010.
46. Dobbins M, Ciliska D, Cockerill R, Barnsley J, DiCenso A. A framework for the dissemination and utilization of research for health-care policy and practice. *Online J Knowl Synth Nurs* 2002;9:7.

47. Mendel P, Meredith LS, Schoenbaum M, Sherbourne CD, Wells KB. Interventions in organizational and community context: a framework for building evidence on dissemination and implementation in health services research. *Adm Policy Ment Health* 2008;35(1-2):21-37.
48. Robinson K, Elliott SJ, Driedger SM, et al. Using linking systems to build capacity and enhance dissemination in heart health promotion: a Canadian multiple-case study. *Health Educ Res* 2005;20(5):499-513.
49. Kreuter MW, Casey CM, Bernhardt JM. Enhancing dissemination through marketing and distribution systems: a vision for public health. In: Brownson RC, Colditz G, Proctor EK, eds. *Dissemination and implementation research in health: translating science to practice*. Oxford, New York: Oxford University Press, 2012.
50. Gustle L-H, Hansson K, Sundell K, Andree-Lofholm C. Implementation of evidence-based models in social work practice: practitioners' perspectives on an MST trial in Sweden. *J Child Adol Subst Abuse* 2008;17(3):111-25.
51. Herie M, Martin GW. Knowledge diffusion in social work: a new approach to bridging the gap. *Social Work* 2002;47(1):85-95.
52. Martin GW, Herie MA, Turner BJ, Cunningham JA. A social marketing model for disseminating research-based treatments to addictions treatment providers. *Addiction* 1998;93(11):1703-15.
53. Deschesnes M, Trudeau F, K  b   M. Factors influencing the adoption of a Health Promoting School approach in the province of Quebec, Canada. *Health Educ Res* 2010;25(3):438-50.
54. Hanbury A, Thompson C, Wilson PM, et al. Translating research into practice in Leeds and Bradford (TRiPLaB): a protocol for a programme of research. *Implement Sci* 2010;5:37.
55. Greenhalgh T, Robert G, Macfarlane F, Bate P, Kyriakidou O. Diffusion of innovations in service organizations: systematic review and recommendations. *Milbank Q* 2004;82(4):581-629.
56. Harris JR, Cheadle A, Hannon PA, et al. A framework for disseminating evidence-based health promotion practices. *Prev Chronic Dis* 2012;9:E22.
57. Hamer S. Developing an innovation ecosystem: a framework for accelerating knowledge transfer. *J Manag Marketing Healthcare* 2010;3(4):248-55.
58. Ward V, Smith S, Carruthers S, House A, Hamer S. Knowledge brokering: exploring the process of transferring knowledge into action. Leeds, UK: University of Leeds, 2010.
59. Ward VL, House AO, Hamer S. Developing a framework for transferring knowledge into action: a thematic analysis of the literature. *J Health Serv Res Policy* 14(3);2009:156-64.
60. Ward V, Smith S, House A, Hamer S. Exploring knowledge exchange: a useful framework for practice and policy. *Soc Sci Med* 2012;74 (3); 297-304.
61. Cordero C, Delino R, Jeyaseelan L, et al. Funding agencies in low-and middle-income countries: support for knowledge translation. *Bull WHO* 2008;86(7):524-34.
62. Ellen ME, Lavis JN, Ouimet M, Grimshaw J, Bedard PO. Determining research knowledge infrastructure for healthcare systems: a qualitative study. *Implement Sci* 2011;6(1):60.
63. IWH. Institute for Work and Health—Knowledge Transfer & Exchange Guides. 2006 [www.iwh.on.ca/kte-guides](http://www.iwh.on.ca/kte-guides).
64. Lavis JN, Lomas J, Hamid M, Sewankambo NK. Assessing country-level efforts to link research to action. *Bull WHO* 2006;84(8):620-8.
65. Lavis JN, Robertson D, Woodside JM, McLeod CB, Abelson J. How can research organizations more effectively transfer research knowledge to decision makers? *Milbank Q* 2003;81(2):221-48.
66. Hunter SM. *Applying social marketing and diffusion of innovation theories: an analysis of the marketing and communication activities of performing arts organizations*. Akron OH: University of Akron, 2007.
67. Dearing JW. Social marketing and diffusion-based strategies for communicating with unique populations: HIV prevention in San Francisco. *J Health Commun* 1996;1(4):343-64.
68. Dearing JW, Maibach EW, Buller DB. A convergent diffusion and social marketing approach for disseminating proven approaches to physical activity promotion. *Am J Prev Med* 2006;31(4S):S11-S23.

69. Dodson EA, Brownson RC, Weiss SW. Policy dissemination research. In: Brownson R, Colditz G, Proctor EK, eds. *Dissemination and implementation research in health: translating science to practice*. Oxford, New York: Oxford University Press, 2012.
70. Orlandi MA. Health promotion technology transfer: organizational perspectives. *Can J Public Health* 1996;87 (S2):S28–S33.
71. Chambers D, Rängeisen H, Hoagwood K, Patel V (adapted by). Leading clinical practice change. In: Dopson S, Mark AL, eds. *Leading health care organizations*. Houndmills, UK: Palgrave Macmillan, 2003.
72. Pettigrew AM, Ferlie E, McKee L. *Shaping strategic change: making change in large organizations: the case of the National Health Service*. Thousand Oaks CA: Sage, 1992.
73. Bridges E. Facilitation of evidence-based nursing practice during military operations. *Nurs Res* 2010;59(1):S75.
74. Nieva VF, Murphy R, Ridley N, et al. From science to service: a framework for the transfer of patient safety. In: *Advances in patient safety: from research to implementation*. Vol. 2. AHRQ Publ 050021. Rockville, MD: Agency for Healthcare Research and Quality, 2005. [www.ahrq.gov/qual/advances/](http://www.ahrq.gov/qual/advances/).
75. TIDIRH Working Group. Interacting elements of integrating science, policy, and practice. In: *Training institute for dissemination and implementation research in health*. Conference proceedings. Chapel Hill NC, 2011.
76. Emshoff JG. Researchers, practitioners, and funders: using the framework to get us on the same page. *Am J Commun Psychol* 2008;41(3):393–403.
77. Lee SJ, Altschul I, Mowbray CT. Using planned adaptation to implement evidence-based programs with new populations. *Am J Commun Psychol* 2008;41(3):290–303.
78. Lesesne CA, Lewis KM, White CP, Green DC, Duffy JL, Wandersman A. Promoting science-based approaches to teen pregnancy prevention: proactively engaging the three systems of the interactive systems framework. *Am J Commun Psychol* 2008;41(3–4):379–92.
79. Ozer EJ, Cantor JP, Cruz GW, Fox B, Hubbard E, Moret L. The diffusion of youth-led participatory research in urban schools: the role of the prevention support system in implementation and sustainability. *Am J Commun Psychol* 2008;41(3):278–89.
80. Roller LA, Wilson MM, Paluzzi PA, Sedivy VJ. Building capacity of state adolescent pregnancy prevention coalitions to implement science-based approaches. *Am J Commun Psychol* 2008;41(3):225–34.
81. Wandersman A, Duffy J, Flaspohler P, et al. Bridging the gap between prevention research and practice: the interactive systems framework for dissemination and implementation. *Am J Community Psychol* 2008;41(3–4):171–81.
82. Dearing JW, Kreuter MW. Designing for diffusion: How can we increase uptake of cancer communication innovations? *Patient Educ Couns* 2010;81S:S100–S110.
83. Orleans CT. Increasing the demand for and use of effective smoking-cessation treatments: reaping the full health benefits of tobacco-control science and policy gains—in our lifetime. *Am J Prev Med* 2007;33(6):S340–S348.
84. Green LW, Orleans CT, Ottoson JM, Cameron R, Pierce JP, Bettinghaus EP. Inferring strategies for disseminating physical activity policies, programs, and practices from the successes of tobacco control. *Am J Prev Med* 2006;31(4S):S66–S81.
85. Havelock RG. *Planning for innovation through dissemination and utilization of knowledge*. Ann Arbor MI: Centre for Research on Utilization of Scientific Knowledge, Institute for Social Research, University of Michigan, 1969.
86. Green LW, Ottoson JM, Garcia C, Hiatt RA. Diffusion theory and knowledge dissemination, utilization, and integration in public health. *Annu Rev Public Health* 2009;30:151–74.
87. Etkin CD, Prohaska TR, Harris BA, Latham N, Jette A. Feasibility of implementing the Strong for Life program in community settings. *Gerontologist* 2006;46(2):284.
88. Evans JM, Kiran PR, Bhattacharyya OK. Activating the knowledge-to-action cycle for geriatric care in India. *Health Res Policy Sys* 2011;9(1):42.
89. Forhan M, Law M. An evaluation of a workshop about obesity designed for occupational therapists. *Can J Occup Ther* 2009;76(5):351–8.

90. Peterson EW, McMahon E, Farkas M, Howland J. Completing the cycle of scholarship of practice: a model for dissemination and utilization of evidence-based interventions. *Occup Ther Health Care* 2005;19(1-2):31-46.
91. Farkas M, Anthony WA. Bridging science to service: using Rehabilitation Research and Training Center program to ensure that research-based knowledge makes a difference. *J Rehabil Res Dev* 2007;44(6):879-92.
92. Farkas M, Jette AM, Tennstedt S, Haley SM, Quinn V. Knowledge dissemination and utilization in gerontology: an organizing framework. *Gerontologist* 2003;43(S1):S47.
93. Kontos PC, Poland BD. Mapping new theoretical and methodological terrain for knowledge translation: contributions from critical realism and the arts. *Implement Sci* 2009;4:1.
94. Davis D, Evans M, Jadad A, et al. The case for knowledge translation: shortening the journey from evidence to effect. *BMJ* 2003;327(7405):33-5.
95. Pathman DE, Konrad TR, Freed GL, Freeman VA, Koch GG. The awareness-to-adherence model of the steps to clinical guideline compliance: the case of pediatric vaccine recommendations. *Medical Care* 1996;34(9):873.
96. Green LW, Kreuter MW. *Health program planning : an educational and ecological approach*. 4th ed. New York: McGraw-Hill, 2005.
97. Dreisinger ML, Boland EM, Filler CD, Baker EA, Hessel AS, Brownson RC. Contextual factors influencing readiness for dissemination of obesity prevention programs and policies. *Health Educ Res* 2012;27(2):292-306.
98. El-Jardali F, Lavis JN, Ataya N, Jamal D. Use of health systems and policy research evidence in the health policymaking in eastern Mediterranean countries: views and practices of researchers. *Implement Sci* 2012;7:2.
99. Majdzadeh R, Yazdizadeh B, Nedjat S, Gholami J, Ahghari S. Strengthening evidence-based decision-making: Is it possible without improving health system stewardship? *Health Policy Plan* 2011:1-6.
100. Gholami J, Majdzadeh R, Nedjat S, Maleki K, Ashoorkhani M, Yazdizadeh B. How should we assess knowledge translation in research organizations; designing a knowledge translation self-assessment tool for research institutes (SATORI). *Health Res Policy Syst* 2011;9:10.
101. Majdzadeh R, Sadighi J, Nejat S, Mahani AS, Gholami J. Knowledge translation for research utilization: design of a knowledge translation model at Tehran University of Medical Sciences. *J Contin Educ Health Prof* 2008;28(4):270-7.
102. Van der Putten M, Vichit-Vadakan N. A pilot use of team-based learning in graduate public health education. *Southeast Asian J Tropical Med Publ Health* 2010;41(3):743.
103. Vonk G, Geertman S, Schot P. Bottlenecks blocking widespread usage of planning support systems. *Environ Plan* 2005;37(5):909-24.
104. Frambach RT, Schillewaert N. Organizational innovation adoption: a multi-level framework of determinants and opportunities for future research. *J Bus Res* 2002;55(2):163-76.
105. Campbell B. Applying knowledge to generate action: a community-based knowledge translation framework. *J Contin Educ Health Prof* 2010;30(1):65-71.
106. Driedger SM, Kothari A, Graham ID, et al. If you build it, they still may not come: outcomes and process of implementing a community-based integrated knowledge translation mapping innovation. *Implement Sci* 2010;5.
107. Gifford WA, Davies B, Graham ID, Lefebvre N, Tourangeau A, Woodend K. A mixed methods pilot study with a cluster randomized control trial to evaluate the impact of a leadership intervention on guideline implementation in home care nursing. *Implement Sci* 2008;3:51.
108. Kothari A, Driedger SM, Bickford J, et al. Mapping as a knowledge translation tool for Ontario Early Years Centres: views from data analysts and managers. *Implement Sci* 2008;3.
109. Graham K, Logan J. Using the Ottawa model of research use to implement a skin care program. *J Nurs Care Qual* 2004;19(1):18-24.
110. Hogan DL, Logan JO. The Ottawa model of research use: a guide to clinical innovation in the NICU. *Clin Nurse Spec* 2004;18(5):255.
111. Logan J, Graham ID. Toward a comprehensive interdisciplinary model of health care research use. *Sci Commun* 1998;20(2):227.

112. Logan J, Graham ID. The Ottawa Model of Research Use. In: Bucknall JR-MaT, ed. Models and frameworks for implementing evidence-based practice: evidence to action. Oxford: Wiley-Blackwell, 2010.
113. Aittasalo M, Miilunpalo S, StÅ¥hl T, Kukkonen-Harjula K. From innovation to practice: initiation, implementation and evaluation of a physician-based physical activity promotion programme in Finland. *Health Promot Int* 2007;22(1):19.
114. De Meij JSB, Chinapaw MJM, Kremers SPJ, Jurg ME, Van Mechelen W. Promoting physical activity in children: the stepwise development of the primary school-based JUMP-in intervention applying the RE-AIM evaluation framework. *Brit J Sports Med* 2010;44(12):879–87.
115. Glasgow RE, Nelson CC, Strycker LA, King DK. Using RE-AIM metrics to evaluate diabetes self-management support interventions. *Am J Prev Med* 2006;30(1):67–73.
116. Van Acker R, De Bourdeaudhuij I, De Cocker K, Klesges L, Cardon G. The impact of disseminating the whole-community project ‘10,000 Steps’: a RE-AIM analysis. *BMC Publ Health* 2011;11(1):3.
117. Glasgow RE, Vogt TM, Boles SM. Evaluating the public health impact of health promotion interventions: the RE-AIM framework. *Am J Publ Health* 1999;89(9):1322–7.
118. Curran GM, Mukherjee S, Allee E, Owen RR. A process for developing an implementation intervention: QUERI Series. *Implemen Sci* 2008;3(1):17.
119. Gary TL, Bone LR, Hill MN, et al. Randomized controlled trial of the effects of nurse case manager and community health worker interventions on risk factors for diabetes-related complications in urban African Americans. *Prev Med* 2003;37(1):23–32.
120. Guidotti TL, Ford L, Wheeler M. The Fort McMurray demonstration project in social marketing: theory, design, and evaluation. *Am J Prev Med* 2000;18(2):163–9.
121. Ottoson JM, Green LW. Community outreach: from measuring the difference to making a difference with health information. *J Med Library Assoc* 2005;93(4S):S49.
122. Damush TMDV, Bravata DM, Plue L, Woodward-Hagg H, Williams LS. Facilitation of Best Practices (FAB) Framework. Stroke Quality Enhancement Research Initiative (QUERI) Center Annual Report presentation, 2008.
123. Bauman AE, Nelson DE, Pratt M, Matsudo V, Schoeppe S. Dissemination of physical activity evidence, programs, policies, and surveillance in the international public health arena. *Am J Prev Med* 2006;31(4S):S57–S65.
124. Bowen S, Zwi AB. Pathways to “evidence-informed” policy and practice: a framework for action. *PLoS Med* 2005;2(7):e166.
125. Collins C, Harshbarger C, Sawyer R, Hamdallah M. The diffusion of effective behavioral interventions project: development, implementation, and lessons learned. *AIDS Educ Prev* 2006;18(4S A):5–20.
126. Collins CB Jr., Johnson WD, Lyles CM. Linking research and practice: evidence-based HIV prevention. *Focus* 2007;22(7):1–5.
127. Neumann MS, Sogolow ED. Replicating effective programs: HIV/AIDS prevention technology transfer. *AIDS Educ Prev* 2000;12(5S):S35–S48.
128. Sogolow E, Peersman G, Semaan S, Strouse D, Lyles CM. The HIV/AIDS Prevention Research Synthesis Project: scope, methods, and study classification results. *J Acquir Immun Defic Syndr* 2002;30(S1):S15–S29.
129. Sogolow ED, Kay LS, Doll LS, et al. Strengthening HIV prevention: application of a research-to-practice framework. *AIDS Educ Prev* 2000;12(5S):S21–S32.
130. CDC-DHAP. HIV/AIDS Prevention Research Synthesis Project. [www.cdc.gov/hiv/topics/research/prs/index.htm](http://www.cdc.gov/hiv/topics/research/prs/index.htm).
131. Beck A, Bergman DA, Rahm AK, Dearing JW, Glasgow RE. Using implementation and dissemination concepts to spread 21st-century well-child care at a health maintenance organization. *Permanente J* 2009;13(3):10.
132. Feldstein AC, Glasgow RE. A practical, robust implementation and sustainability model (PRISM) for integrating research findings into practice. *Jt Comm J Qual Patient Saf* 2008;34(4):228–43.
133. Casado BL, Quijano LM, Stanley MA, Cully JA, Steinberg EH, Wilson NL. Healthy IDEAS: implementation of a depression program through community-based case management. *Gerontologist* 2008;48(6):828.

134. Graff CA, Springer P, Bitar GW, Gee R, Arredondo R. A purveyor team's experience: lessons learned from implementing a behavioral health care program in primary care settings. *Families, Syst, Health* 2010;28(4):356.
135. Fixsen DL, Naoom SF, Blase KA, Friedman RM, Wallace F. *Implementation research: a synthesis of the literature*. Tampa FL: University of South Florida, Louis de la Parte Florida Mental Health Institute, The National Implementation Research Network, 2005. FMHI Publ. #231.
136. Institute FCD. National Implementation Research Network. 2008. [www.fpg.unc.edu/~nirn/implementation/01\\_implementationdefined.cfm](http://www.fpg.unc.edu/~nirn/implementation/01_implementationdefined.cfm)
137. Weiner BJ, Haynes-Maslow L, Kahwati LC, Kinsinger LS, Campbell MK. Implementing the MOVE! weight-management program in the Veterans Health Administration, 2007-2010: a qualitative study. *Prev Chron Dis* 2012;9:110127. [dx.doi.org/10.5888/pcd9.110127](https://doi.org/10.5888/pcd9.110127).
138. Weiner BJ, Lewis MA, Linnan LA. Using organization theory to understand the determinants of effective implementation of worksite health promotion programs. *Health Educ Res* 2009;24(2):292–305.
139. Murphy A, Rhodes AG, Taxman FS. Adaptability of contingency management in justice settings: survey findings on attitudes toward using rewards. *J Subst Abuse Treatment*. Epub before print, 2011.
140. Proctor EK, Landsverk J, Aarons G, Chambers D, Glisson C, Mittman B. Implementation research in mental health services: an emerging science with conceptual, methodological, and training challenges. *Admin Policy Mental Health* 2009;36(1):24–34.
141. Dong L, Neufeld DJ, Higgins C. Testing Klein and Sorra's innovation implementation model: an empirical examination. *J Engin Technol Manag* 2008;25(4):237–55.
142. Holahan PJ, Aronson ZH, Jurkat MP, Schoorman FD. Implementing computer technology: a multiorganizational test of Klein and Sorra's model. *J Engin Technol Manag* 2004;21(1-2):31–50.
143. Osei-Bryson KM, Dong L, Ngwenyama O. Exploring managerial factors affecting ERP implementation: an investigation of the Klein-Sorra model using regression splines. *Inf Syst J* 2008;18(5):499–527.
144. Robertson J, Sorbello T, Unsworth K. Innovation Implementation: the role of technology diffusion agencies. *J Technol Manag Innov* 2008;3(3):1–10.
145. Sawang S. Innovation implementation effectiveness: a multiorganizational test of Klein Conn and Sorra's model. [dissertation]. 2008.
146. Sheldon MR. Evidence-based practice in occupational health: description and application of an implementation effectiveness model. *Work: J Prev Assess Rehab* 2007;29(2):137–43.
147. Klein KJ, Conn AB, Sorra JS. Implementing computerized technology: an organizational analysis. *J Appl Psychol* 2001;86(5):811.
148. Klein KJ, Sorra JS. The challenge of innovation implementation. *Acad Manag Rev* 1996:1055–80.
149. Gallacher K, May CR, Montori VM, Mair FS. Understanding patients' experiences of treatment burden in chronic heart failure using normalization process theory. *Ann Fam Med* 2011;9(3):235–43.
150. Gunn JM, Palmer VJ, Dowrick CF, et al. Embedding effective depression care: using theory for primary care organizational and systems change. *Implem Sci* 2010;5(1):62.
151. Kennedy A, Chew-Graham C, Blakeman T, et al. Delivering the WISE (whole systems informing self-management engagement) training package in primary care: learning from formative evaluation. *Implemen Sci* 2010;5(7).
152. May C, Finch T, Cornford J, et al. Integrating telecare for chronic disease management in the community: What needs to be done? *BMC Health Serv Res* 2011;11(1):131.
153. Murray E, Burns J, May C, et al. Why is it difficult to implement e-health initiatives? A qualitative study. *Implemen Sci* 2011;6(1):6.
154. Sanders T, Foster N, Ong BN. Perceptions of general practitioners towards the use of a new system for treating back pain: a qualitative interview study. *BMC Med* 2011;9(1):49.
155. May C, Murray E, Finch T, Mair F, Treweek S, Ballini L, Macfarlane A, Rapley T. Normalization process theory on-line users' manual and toolkit. 2010. [www.normalizationprocess.org](http://www.normalizationprocess.org).
156. May C, Finch T. Implementing, embedding, and integrating practices: an outline of normalization process theory. *Sociology: J Brit Sociol Assoc* 2009;43(3):535–54.
157. Murray E, Treweek S, Pope C, et al. Normalisation process theory: a framework for developing, evaluating and implementing complex interventions. *BMC Med* 2010;8:63.

158. Bansod VA. Promoting action on research implementation in health services (PARIHS) framework: application to the Fracture Fighters Program. [dissertation] Toronto: University of Toronto, 2009.
159. Conklin J, Kothari A, Stolee P, Chambers L, Forbes D, Le Clair K. Knowledge-to-action processes in SHRTN collaborative communities of practice: a study protocol. *Implem Sci* 2011;6(1):12.
160. Cummings GG, Estabrooks CA, Midodzi WK, Wallin L, Hayduk L. Influence of organizational characteristics and context on research utilization. *Nurs Res* 2007;56(S4):S24.
161. Estabrooks CA, Squires JE, Cummings GG, Teare GF, Norton PG. Study protocol for the translating research in elder care (TREC): building context—an organizational monitoring program in long-term care project (project one). *Implem Sci* 2009;4(1):52.
162. Helfrich CD, Damschroder LJ, Hagedorn HJ, et al. A critical synthesis of literature on the promoting action on research implementation in health services (PARIHS) framework. *Implemen Sci* 2010;5(1):82.
163. Helfrich CD, Li YF, Sharp ND, Sales AE. Organizational readiness to change assessment (ORCA): development of an instrument based on the Promoting Action on Research in Health Services (PARIHS) Framework. *Implemen Sci* 2009;4:38.
164. Kitson A, Harvey G, McCormack B. Enabling the implementation of evidence based practice: a conceptual framework. *Qual Health Care* 1998;7(3):149.
165. Kitson AL, Rycroft-Malone J, Harvey G, McCormack B, Seers K, Titchen A. Evaluating the successful implementation of evidence into practice using the PARIHS framework: theoretical and practical challenges. *Implemen Sci* 2008;3:1.
166. Rycroft-Malone J. The PARIHS framework—a framework for guiding the implementation of evidence-based practice. *J Nurs Care Qual* 2004;19(4):297–304.
167. Needham DM, Korupolu R, Zanni JM, et al. Early physical medicine and rehabilitation for patients with acute respiratory failure: a quality improvement project. *Archiv Phys Med Rehab* 2010;91(4):536–42.
168. Pronovost P. Interventions to decrease catheter-related bloodstream infections in the ICU: the Keystone Intensive Care Unit Project. *Am J Infec Contr* 2008;36(10);S171:e1–e171;e5.
169. Pronovost PJ, Berenholtz SM, Needham DM. Translating evidence into practice: a model for large scale knowledge translation. *BMJ* 2008;337.
170. Szulanski G. The process of knowledge transfer: a diachronic analysis of stickiness. *Org Behav Human Decision Proc* 2000;82(1):9–27.
171. Elwyn G, Taubert M, Kowalczyk J. Sticky knowledge: a possible model for investigating implementation in healthcare contexts. *Implement Sci* 2007;2:44.
172. Szulanski G. Exploring internal stickiness: impediments to the transfer of best practice within the firm. *Strat Manag J* 1996;17:27–43.
173. Lash SJ, Timko C, Curran GM, McKay JR, Burden JL. Implementation of evidence-based substance use disorder continuing care interventions. *Psychol Addict Behav* 2011;25(2):238–51.
174. Hartzler B, Lash SJ, Roll JM. Contingency management in substance abuse treatment: a structured review of the evidence for its transportability. *Drug Alcohol Depen* 2011;122(1-2):1–10.
175. Sorensen JL, Kosten T. Developing the tools of implementation science in substance use disorders treatment: applications of the consolidated framework for implementation research. *Psychol Addict Behav* 2011;25(2):262.
176. Williams EC, Johnson ML, Lapham GT, et al. Strategies to implement alcohol screening and brief intervention in primary care settings: a structured literature review. *Psychol Addict Behav* 2011;25(2):206–14.
177. Damschroder LJ, Aron DC, Keith RE, Kirsh SR, Alexander JA, Lowery JC. Fostering implementation of health services research findings into practice: a consolidated framework for advancing implementation science. *Implement Sci* 2009;4:50.
178. Damschroder L. Consolidated framework for implementation research (CFIR) Wiki. 2010. [wiki.cfirwiki.net](http://wiki.cfirwiki.net).
179. de Graaf IM. Helping families change: the adoption of the Triple P–Positive Parenting Program in the Netherlands. [dissertation]. Amsterdam: Universiteit van Amsterdam, 2009.



180. Stevens AB, Lancer K, Smith ER, Allen L, McGhee R. Engaging communities in evidence-based interventions for dementia caregivers. *Family Community Health* 2009;32(1):S83.
181. Kilbourne AM, Neumann MS, Pincus HA, Bauer MS, Stall R. Implementing evidence-based interventions in health care: application of the replicating effective programs framework. *Implement Sci* 2007;2:42.
182. Glisson C, Dukes D, Green P. The effects of the ARC organizational intervention on caseworker turnover, climate, and culture in children's service systems. *Child Abuse Neglect* 2006;30(8):855–80.
183. Glisson C, Schoenwald SK. The ARC organizational and community intervention strategy for implementing evidence-based children's mental health treatments. *Mental Health Serv Res* 2005;7(4):243–59.
184. Glisson C, Schoenwald SK, Hemmelgarn A, et al. Randomized trial of MST and ARC in a two-level evidence-based treatment implementation strategy. *J Consult Clin Psychol* 2010;78(4):537–50.
185. Aarons GA, Hurlburt M, Horwitz SM. Advancing a conceptual model of evidence-based practice implementation in public service sectors. *Admin Policy Mental Health* 2011;38(1):4–23.
